# Molecular evolution of juvenile hormone esterase-like proteins in a socially exchanged fluid

Adria C. LeBoeuf<sup>1,2,3</sup>, Amir B. Cohanim<sup>4</sup>, Céline Stoffel<sup>3</sup>, Colin S. Brent<sup>5</sup>, Patrice Waridel<sup>6</sup>, Eyal Privman<sup>4</sup>, Laurent Keller<sup>\*3</sup>, Richard Benton<sup>\*2</sup>

\* These authors contributed equally.

• Co-corresponding

1. Weizmann Institute of Science, Department of Physics of Complex Systems, Rehovot, Israel
2. Center for Integrative Genomics, University of Lausanne, Lausanne, Switzerland
3. Department of Ecology and Evolution, University of Lausanne, Lausanne, Switzerland
4. Department of Evolutionary and Environmental Biology, Institute of Evolution, University of Haifa, Haifa, Israel
5. Arid Land Agricultural Research Center, USDA-ARS, Maricopa, United States
6. Protein Analysis Facility, University of Lausanne, Lausanne, Switzerland

---

## Abstract

Socially exchanged fluids are a direct means for organisms to influence conspecifics. When orally feeding larval offspring via trophallaxis, *Camponotus floridanus* ant workers were shown to transfer Juvenile Hormone (JH), a key developmental regulator, as well as paralogs of JH esterase (JHE), an enzyme that hydrolyzes JH. We combine proteomic, phylogenetic and selection analyses to investigate the evolution of this esterase subfamily. We show that *Camponotus* JHE-like proteins have sustained multiple duplications, positive selection, and changed localization to become abundantly and selectively present in trophallactic fluid. To assess their potential role in larval development, we fed workers a JHE-specific inhibitor to introduce it into the trophallactic network. This increased the proportion larvae reared to metamorphosis by these workers, similar to supplementation with JH. Together these findings suggest that JHE-like proteins have evolved new roles in inter-individual regulation of larval development in *Camponotus*.

## Introduction

Coordination between cells in a multicellular organism often occurs through hormones, which bind to receptors on or in different cell types throughout the body. Analogously, coordination between individuals in insect colonies is frequently mediated by chemical communication (i.e., pheromones). Many social insects also engage in oral trophallaxis, a mouth-to-mouth fluid transfer that connects every member of the colony, including larvae. Trophallaxis was previously assumed to be mainly a food-sharing mechanism [1–3]. However, we recently showed that trophallactic fluid in *Camponotus floridanus* carpenter ants contains hormones, nestmate recognition cues, small RNAs, and a variety of proteins, many of which have been associated with growth and development [4], suggesting broader functions for this fluid in inter-individual communication. Amongst these molecules, the presence of Juvenile Hormone III (JH) was of particular interest [4] because this hormone is a key regulator of insect development [5,6] and reproduction [7–9] across insects, and of caste determination [5–7,10–13] and division of labor [14–18] in social insects. During larval development, JH works in conjunction with another group of

43 hormones, the ecdysteroids, to induce successive molts and pupation and determine developmental  
44 trajectory [10,11,19–21].

45 JH levels are modulated through varied rates of biosynthesis and degradation. In canonical insect  
46 physiology, JH is synthesized by paired corpora allata in both larval and adult stages [6]. After being  
47 released into the hemolymph, JH is primarily metabolized by two enzymes that peak in late-larval  
48 development, JH esterase (JHE), which is produced in the fat body, and the more broadly-expressed,  
49 membrane-bound JH epoxide hydrolase [22,23]. Intriguingly, in addition to JH, *C. floridanus* trophallactic  
50 fluid contains abundant JHE-like proteins [4], raising questions about the role of these enzymes in  
51 trophallactic fluid.

---

## 52 Results

### 53 *Variable presence of JH and JHE-like proteins in social insect trophallactic fluid*

54 We first assessed whether JH and JHEs are present in the trophallactic fluid of three additional species  
55 (*Camponotus fellah*, *Solenopsis invicta* (red imported fire ant) and *Apis mellifera* (European honey bee)),  
56 by reanalyzing previous data [4] and combining this with additional small-molecule and proteomic  
57 analyses (Materials and Methods). The trophallactic fluid of both *Camponotus* species contained JH (SI  
58 Table 1) and abundant peptides mapping to multiple JHE-like proteins (approximately 18% of total  
59 trophallactic fluid protein in both species, SI Table 2). By contrast, the trophallactic fluid of *S. invicta* and  
60 *A. mellifera* contained neither the hormone nor the JHE-like enzymes (SI Table 1, SI Table 2). These  
61 results indicate that the presence of JH and JHEs in this social fluid is variable across social insects,  
62 implying that it is unlikely to simply result from a passive process such as diffusion from hemolymph.

### 63 *The esterase repertoire of C. floridanus*

64 Insect genomes encode many esterases with diverse substrates, yet any given species has one active  
65 JHE, defined by its ability to efficiently metabolize JH either *in vitro* or *in vivo*, and by its expression in  
66 late larval development and the adult fat body [22–30]. Our proteomic survey of *C. floridanus* [4]  
67 revealed that hemolymph and trophallactic fluid contain different JHE-like proteins. To explore the  
68 evolutionary relationships of these enzymes, we first re-annotated all carboxylesterases within the *C.*  
69 *floridanus* genome, identifying 26 genes and gene fragments (Figure 1, Supplemental File 1). Although  
70 the *C. floridanus* genome is incompletely assembled (v3.3; 10% of base pairs are found in scaffolds  
71 under 4 kbp), we noted that 17 of 26 esterase genes localize to four tandem arrays (Figure 1), indicative  
72 of recent tandem duplications. Two of these arrays and one single-gene scaffold encode the seven JHE-  
73 like proteins detected in trophallactic fluid.

74 To assess these JHEs' potential for enzymatic function, we checked for the presence of the sequence  
75 motifs of the catalytic triad (GxSxG, E/D, GxxHxxD/E) [26,31]. The serine of the catalytic triad for  
76 functionally characterized JHEs lies within a GQSAG motif, while other non-JH-specific esterases have  
77 different motifs (e.g., GESAG in *D. melanogaster*'s  $\alpha$ -esterases). In *C. floridanus*, all of the esterases  
78 present in trophallactic fluid have the amino acid motifs necessary to catalyze the hydrolysis of JH, while  
79 many esterases present in hemolymph and in larvae do not (Figure 1).

### 80 *Camponotus trophallactic esterases have duplicated, experienced positive selection and have 81 become abundant in trophallactic fluid*

82 To gain insight into the evolution of the *C. floridanus* trophallactic esterases, we re-annotated  
83 carboxylesterase genes of 33 ant species whose genomes or transcriptomes were available (i.e., the 19

84 available *Formicinae*, including six *Camponotus* species and eight species of the comparably species-  
85 rich formicine genus *Formica*, 11 *Myrmicinae*, and three more distantly related species, Supplementary  
86 File 1, Supplementary File 2). We similarly re-annotated carboxylesterase genes in four outgroups (*A.*  
87 *mellifera*, *Nasonia vitripennis* (parasitoid jewel wasp), *Culex quinquefasciatus* (mosquito), *Manduca*  
88 *sexta* (hawkmoth)) and constructed an initial protein tree of all the esterases (SI Figure 1) to define  
89 membership in the clade containing the trophallactic esterases. To determine the origin of the  
90 *Camponotus* trophallactic esterases relative to known JHEs within the carboxylesterases gene family,  
91 we built a protein tree including the re-annotated esterase sequences from six ant genomes, five  
92 outgroups and five JHEs from other insect orders (SI Figure 2). Consistent with previous work [30,32],  
93 JHEs assorted phylogenetically into four clusters. Of all *A. mellifera* esterases, it was this species' JHE  
94 that is found basal to the clade containing the *C. floridanus* trophallactic esterases.

95 To analyze duplication and positive selection of the *C. floridanus* trophallactic esterases, we performed a  
96 phylogenetic analysis of the subset of esterase sequences that fall within the clade for which the *A.*  
97 *mellifera* JHE is most basal (Figure 2). Multiple gene duplication events led to an expansion in the  
98 *Camponotus* clade, whereas no such repeated duplications were apparent in the sister clade of  
99 formicine esterases from *Formica*, *Lasius* and *Cataglyphis*. Each *Camponotus* species had more  
00 esterases in this clade (five to 12) than each species of *Formica* (one to two; t-test,  $p < 10^{-5}$ ). We  
01 investigated the existence of signatures of positive selection by applying the branch-site test for positive  
02 selection [33,34], where each branch was tested for codon sites with a dN/dS ratio  $> 1$ . Significant  
03 positive selection was found in 28 branches (at FDR  $< 0.1$ , SI Table 3, SI Figure 3). Of the 35 branches  
04 in the *Camponotus*-specific subtree, 13 were positively selected (37%, more than expected by chance  
05  $\chi^2=14.933$ ,  $p < 0.001$ ). Thus, positive selection and associated duplications are apparent in this protein  
06 family in the *Camponotus* lineage.

07 Combining proteomic localization information with this phylogenetic analysis revealed that branch length  
08 (amino acid change) was positively correlated with expression in trophallactic fluid (Figure 2, SI Figure 4,  
09 Spearman's rank correlation  $p < 0.0005$ ,  $\rho = 0.85$ ). The most basal *C. floridanus* esterase in this clade,  
10 Cflo.Est13, exhibits a low rate of evolution and a localization pattern (adult worker hemolymph, larvae,  
11 and trophallactic fluid) that is more typical of a JHE, suggesting conservation of an ancestral function.

### 12 *Positively selected amino-acid changes may alter the function of abundant trophallactic* 13 *esterases*

14 To better understand the link between positive selection and function, we analyzed the positively  
15 selected sites identified by the branch-site test (posterior probability  $> 0.95$ , Supplementary File 3) that  
16 were found on the branches with significant signatures of positive selection. In the four positively  
17 selected branches leading to the most abundant *Camponotus* esterases (marked with red diamonds in  
18 Figure 2) we found 17 significantly positively-selected sites, and mapped these amino acids onto the  
19 crystal structure of the *M. sexta* JHE (2FJ0, Figure 3) [22,26]. Many of the positively-selected sites were  
20 located on the exterior of the protein, some of which created novel putative glycosylation sites (Figure 3).  
21 Several positively-selected sites were located between the catalytic triad motifs and the exterior of the  
22 protein, potentially influencing the protein's function. Finally, in only the most abundant trophallactic  
23 esterases, the outer lobe of the binding pocket is impinged upon by a phenylalanine (mutated from the  
24 more ancestral glycine in *M. sexta* or proline in *Formica* or Cflo.Est13; Figure 3, Supplementary File 3).  
25 This region of the binding pocket corresponds to where the epoxide moiety of JH would lie [22,26].

### 26 *JHE-inhibitor influences development in vivo*

27 We next focused on the potential role of the trophallactic esterases in larval development. Many ant

28 species exhibit temporally irregular larval development, where the time from egg-hatching to pupation  
29 varies widely, presumably because of differential feeding, even in the same batch of eggs [35–39]. We  
30 previously showed that additional JH in the trophallactic fluid of rearing *C. floridanus* workers increased  
31 the proportion of larvae successfully completing metamorphosis. The trophallactic JHE-like proteins  
32 present a possible means for rearing workers to regulate the presence of JH in trophallactic fluid and  
33 thus influence larval development.

34 Because all of the trophallactic esterases have an intact catalytic triad, their activity is likely to be blocked  
35 by the JHE inhibitor and transition-state-analog of JH, 3-octylthio-1,1,1-trifluoropropan-2-one (OTFP)  
36 [26,27,40]. We fed JH, OTFP, JH and OTFP together, or solvent alone to groups of worker ants rearing  
37 larvae. For each replicate, we measured head width of metamorphosed larvae as a proxy for body size,  
38 the number of larvae that formed a pre-pupa, and of these, the number that underwent metamorphosis.  
39 As observed previously, JH supplementation significantly increased head width (GLMM, JH and OTFP  
40 as fixed effects, and colony as random factor,  $p < 0.001$ , Figure 4A) and increased the number of larvae  
41 that survived past metamorphosis (GLMM binomial, JH and OTFP as fixed effects, and colony as  
42 random factor  $p < 0.018$ , Figure 4B). Treatment with OTFP resulted in no significant change in head  
43 width but increased the number of larvae that survived past metamorphosis (GLMM binomial  $p < 0.018$ ).  
44 The two treatments independently influenced the proportion of larvae surviving metamorphosis (two-way  
45 ANOVA,  $p < 0.017$  each for JH and OTFP; interaction not significant).

---

## 46 Discussion

47 Our results reveal the evolution of a subfamily of JHE-like proteins in carpenter ants that have sustained  
48 many duplications, significant positive selection and shifted their location from hemolymph to the  
49 trophallactic fluid. These esterases have all maintained the catalytic triad characteristic of JHEs, and we  
50 speculate that some of the positively-selected sequence changes observed in these proteins reflect  
51 adaptation during their shift from hemolymph (pH 8) to the extreme acidity of formicine trophallactic fluid  
52 (pH 2-4) [41,42]. Addition of a JHE inhibitor to the trophallactic fluid of rearing workers increased the  
53 proportion of larvae brought to pupation, similar to supplementation with JH. These observations –  
54 together with the conspicuous absence of such JHE-like proteins and JH in the trophallactic fluid of two  
55 other insect species – suggest that this enzyme subfamily has evolved to regulate JH levels in this  
56 socially-transmitted fluid. The identification of seven distinct JHE-like proteins in *C. floridanus*  
57 trophallactic fluid indicates that this subfamily may have multiple roles. For example, some might have  
58 JH-independent functions (e.g., in digestion of food components or in detoxification) while others could  
59 be pseudo-enzymes that protect – rather than degrade – JH as it is passed to larvae through the harsh  
60 trophallactic fluid environment. The selective presence of these proteins in trophallactic fluid might  
61 provide a means to regulate the pool of JH in this compartment independently of the levels of this  
62 hormone in the hemolymph.

## 63 Materials and Methods

### 64 Insect source and rearing

65 *C. floridanus* workers came from four colonies established in the laboratory from approximately 1-year-  
66 old founding queens and associated workers collected from the Florida Keys in 2006 and 2011. Ants  
67 were provisioned once a week with fresh sugar water, an artificial diet of honey or maple syrup, eggs,  
68 agar, canned tuna and a few *Drosophila melanogaster*. Maple syrup was substituted for honey and no  
69 *Drosophila* were provided in development and proteomic experiments to avoid contamination with other  
70 insect proteins. Colonies were maintained at 25°C with 60% relative humidity and a 12 hr light:12 hr dark

71 cycle. *C. fellah* workers came from three colonies established from queens collected after a mating flight  
72 in March 2007 in Tel Aviv, Israel (Colonies #5, 28, 33). The ant colonies were maintained at 32 °C with  
73 60% relative humidity and a 12 hr light:12 hr dark cycle. Fire ant workers (*Solenopsis invicta*) were  
74 collected from three different colonies, two polygyne, one monogyne, maintained at 32°C with 60%  
75 relative humidity and a 12 hr light:12 hr dark cycle. Honeybee workers (*A. mellifera*, Carnica and  
76 Buckfast) were collected from three different hives maintained with standard beekeeping practices.

## 77 **Sample collection**

78 As in [4], ants were anesthetized by CO<sub>2</sub> (on a CO<sub>2</sub> pad; Flypad, FlyStuff) and placed ventral-side up.  
79 The abdomen of each ant was lightly squeezed with soft forceps to prompt the regurgitation of fluids  
80 from the social stomach. Ants that underwent anesthesia and light squeezing recovered in approximately  
81 5 min. Trophallactic fluid was collected with graduated borosilicate glass pipettes, and transferred  
82 immediately to pure EtOH for GC-MS measurement. Trophallactic fluid was pooled from groups of  
83 individuals from different colonies of *C. floridanus* (12-19 individuals, 1-12 µl per pooled group), *C. fellah*  
84 (16-46 individuals, 10-12 µl), *S. invicta* (39-137 individuals, 1-9 µl) and *A. mellifera* (5-20 individuals, 11-  
85 35 µl). Trophallactic fluid was collected from *S. invicta* in the same manner as from *C. floridanus* and *C.*  
86 *fellah*; for *S. invicta* more ants were used due to their smaller body size and crop volume. *A. mellifera*  
87 trophallactic fluid was collected from workers that were first cold-anesthetized and then transferred to a  
88 CO<sub>2</sub> pad to ensure continual anesthesia during collection as described above. Larvae were collected for  
89 proteomic measurement (three second-instar larvae for one sample and one fourth-instar larva for the  
90 other), sliced into 2-5 pieces with iris scissors placed in an Eppendorf tube in buffer (100 mM NaH<sub>2</sub>PO<sub>4</sub>,  
91 1 mM EDTA, 1 mM DTT, pH 7.4) and ground with an Eppendorf pestle. Samples were centrifuged for  
92 one minute to remove solids.

## 93 **JH quantification by GC-MS**

94 As described previously in [4], for each sample, a known quantity of trophallactic fluid was collected into  
95 a graduated glass capillary tube and blown into an individual glass vial containing 5 µL of 100% ethanol.  
96 This biological sample was added to a 1:1 mixture of isooctane and methanol, processed and stored at –  
97 80°C until analysis. Before analysis, 50% acetonitrile (HPLC grade) was added. Prior to purification,  
98 farnesol (Sigma-Aldrich, St Louis, MO) was added to each sample to serve as an internal standard.  
99 Briefly, samples were derivatized in a solution of methyl-d alcohol (Sigma-Aldrich, St Louis, MO) and  
100 trifluoroacetic acid (Sigma-Aldrich) then analyzed using an HP 7890A Series GC (Agilent Technologies,  
101 Santa Clara, CA) coupled to an HP 5975C inert mass selective detector monitoring at m/z 76 and 225 to  
102 ensure specificity for the d<sub>3</sub>-methoxyhydrin derivative of JH III. Total abundance was quantified against a  
103 standard curve of derivatized JH III, and adjusted for the starting volume of trophallactic fluid. The  
104 detection limit of the assay is approximately one pg.

## 105 **Proteomic analyses**

106 Proteomics analyses are mostly based on data published in [4], available through ProteomeXchange at  
107 PXD004825, with the exception of those regarding larval samples described below.

### 108 *Gel separation and protein digestion*

109 Protein samples were loaded on a mini polyacrylamide gel and migrated about 2 cm. After Coomassie  
110 staining, regions of gel lanes containing visible bands were excised into 2–5 pieces, depending on the  
111 gel pattern. Gel pieces were digested with sequencing-grade trypsin (Promega, Switzerland) as  
112 previously described [43]. Extracted tryptic peptides were dried and resuspended in 0.1% formic acid,  
113 2% (v/v) acetonitrile for mass spectrometry analyses.

#### 14 *Proteomic mass spectrometry analyses*

15 Tryptic peptide mixtures were injected on a Dionex RSLC 3000 nanoHPLC system (Dionex, Sunnyvale,  
16 CA, USA) interfaced via a nanospray source to a high-resolution mass spectrometer based on Orbitrap  
17 technology (Thermo Fisher, Bremen, Germany): LTQ-Orbitrap XL or LTQ-Orbitrap Velos. Peptides were  
18 loaded onto a trapping microcolumn (Acclaim PepMap100 C18, 20 mm x 100 mm ID, 5 mm, Dionex)  
19 before separation on a C18 reversed-phase analytical nanocolumn at a flowrate of 0.3 mL/min.

20 The LTQ-Orbitrap Velos mass spectrometer was interfaced with a reversed-phase C18 Acclaim Pepmap  
21 nanocolumn (75 mm ID x 25 cm, 2.0 mm, 100 Å, Dionex) using a 65-min gradient from 5% to 72%  
22 acetonitrile in 0.1% formic acid for peptide separation (total time: 95 min). Full MS surveys were  
23 performed at a resolution of 30,000. In data-dependent acquisition controlled by Xcalibur software, the  
24 15 most intense multiply charged precursor ions detected in the full MS survey scan were selected for  
25 HCD fragmentation (NCE = 40%) in the orbitrap at a resolution of 7,500, with an isolation window of 1.7  
26 m/z, and then dynamically excluded from further selection for 25 s.

27 LTQ-Orbitrap XL instrument was interfaced with a reversed-phase C18 Nikkyo (75 mm ID x 15 cm, 3.0  
28 mm, 120 Å, Nikkyo Technos, Tokyo, Japan) nanocolumn using a 90-min gradient from 4% to 76%  
29 acetonitrile in 0.1% formic acid for peptide separation (total time: 125 min). Full MS surveys were  
30 performed at a resolution of 60,000. In data-dependent acquisition controlled by Xcalibur software, the  
31 10 most intense multiply charged precursor ions detected in the full MS survey scan were selected for  
32 CID fragmentation (NCE = 35%) in the LTQ linear trap with an isolation window of 4.0 m/z and then  
33 dynamically excluded from further selection for 60 s.

#### 34 *Proteomic data analysis*

35 MS data were analyzed using Mascot 2.6 (RRID:SCR\_014322, Matrix Science, London, UK) set up to  
36 search the UniProt (RRID:SCR\_002380, [www.uniprot.org](http://www.uniprot.org)) database restricted to *C. floridanus* (UniProt,  
37 December 2017 version: 14,802 sequences) and a custom database containing the re-annotated  
38 esterases (26 sequences). Trypsin (cleavage at K, R) was used as the enzyme definition, allowing two  
39 missed cleavages. Mascot was searched with a parent ion tolerance of 10 ppm and a fragment ion mass  
40 tolerance of 0.50 Da (LTQ-Orbitrap XL data) or 0.02 Da (LTQ-Orbitrap Velos data). The iodoacetamide  
41 derivative of cysteine was specified in Mascot as a fixed modification. N-terminal acetylation of protein,  
42 deamidation of asparagine and glutamine, and oxidation of methionine were specified as variable  
43 modifications.

44 Scaffold software (version 4.8, RRID:SCR\_014345, Proteome Software Inc., Portland, OR) was used to  
45 validate MS/MS based peptide and protein identifications, and to perform dataset alignment. Peptide  
46 identifications were accepted if they could be established at greater than 90.0% probability as specified  
47 by the Peptide Prophet algorithm [44] with Scaffold delta-mass correction. Protein identifications were  
48 accepted if they could be established at greater than 95.0% probability and contained at least two  
49 identified peptides. Protein probabilities were assigned by the Protein Prophet algorithm [45]. Proteins  
50 that contained similar peptides and could not be differentiated based on MS/MS analysis alone were  
51 grouped to satisfy the principles of parsimony and in most cases these proteins appear identical in  
52 annotations. Proteins sharing significant peptide evidence were grouped into clusters.

53 Quantitative spectral counting was performed using the normalized spectral abundance factor (NSAF), a  
54 measure that takes into account the number of spectra matched to each protein, the length of each  
55 protein and the total number of proteins in the input database [46]. To compare relative abundance  
56 across samples with notably different protein abundance, we divided each protein's NSAF value by the  
57 total sum of NSAF values present in the sample.

58 The additional larval proteomics data are available through ProteomeXchange at PXD009982.

## 59 **PCR-based annotation**

60 Total RNA was extracted from four groups of four minor *C. floridanus* workers. Extraction was performed  
61 with RNeasy Plus micro kit and RNase-Free DNase Set (QIAGEN) and reverse transcription with  
62 TAKARA PrimeScript™ RT Reagent Kit (Perfect Real Time). cDNA from four replicate samples were  
63 pooled and analyzed by PCR to determine whether Cflo.Est3 and Cflo.Est18 were part of the same  
64 gene. Sequences were edited and aligned (CLUSTALW) in MEGA v6.0. Primers, gel, and the resultant  
65 sequence can be found in Supplementary File 1.

## 66 **Gene annotation**

67 The genomes and transcriptomes used in the phylogenetic analyses are listed in Supplementary File 1.  
68 Publicly available, curated carboxylesterase genes from these species were used as queries for re-  
69 annotating carboxylesterase genes using the tool genBlast [47,48]. In brief, genBlast aligns the protein  
70 query sequences to target sequences using BLAST, and stitches blast hits into complete gene structures  
71 while identifying splice junctions at exon\intron boundaries. To alias the resulting gene annotations to  
72 NCBI accession numbers, we used BLAST against the nonredundant (nr) database, followed by a  
73 synteny check. Based on these analyses, we propose new predicted gene-annotations (Supplemental  
74 File 1).

## 75 **Phylogeny reconstruction**

76 Phylogenetic trees were built using RAxML version 8.1.15 [49], with the PROTCATLG model, and 100  
77 bootstraps repeats. Before running RAxML, predicted protein sequences of the annotated genes were  
78 aligned using the multiple sequence alignment program PRANK [50]. After using RogueNaRok  
79 (<http://rnr.h-its.org/>) to prune rogue taxa, the carboxylesterase genes of 39 species listed in  
80 Supplementary File 1 were used to build a preliminary phylogenetic tree (SI Figure 1). The subtree  
81 containing the *A. mellifera* JHE and esterases in the *C. floridanus* trophallactic fluid (Figure 2) were then  
82 separately aligned and their phylogeny reconstructed. In addition, to observe the trophallactic esterases  
83 in the context of phylogenetically related esterases whose functions are known, we built a tree of  
84 characterized JHEs, the re-annotated esterases of model organisms and six representative ants species  
85 (denoted 'representative-tree'; SI Figure 2, included species are outlined in Supplementary File 2).

## 86 **Tests for positive selection**

87 The ratio of non-synonymous to synonymous substitutions (dN/dS) was used to test for positive selection  
88 on genes belonging to the clade crowned by the *A. mellifera* JHE and containing the *C. floridanus*  
89 trophallactic esterases (Figure 2). Two species, *Nylanderia pubens* and *Myrmica rubra*, were removed  
90 due to poor assembly quality. Sequences that were redundant or shorter than 100 aa were filtered out  
91 before alignment. Protein sequences were aligned using PRANK [50], reverse-translated into codon  
92 alignment, and sites with alignment uncertainty were masked with a 0.5 score cutoff using GUIDANCE2  
93 scores [51,52]. To test for positive selection, we used the modified branch-site test model A [53],  
94 implemented in the PAML package, version 4.8a [34]. This is a likelihood ratio test (LRT) that compares  
95 a model allowing positive selection on one of the branches of the phylogeny to a model that allows no  
96 positive selection. LRT *p*-values for each branch were corrected into *q*-values to control the false  
97 discovery rate (FDR) [54]. Each branch with positive LRT at FDR < 0.1 (Supplementary File 3) was  
98 labeled in red in Figure 2. Sites under positive selection were identified based on their posterior  
99 probability for dN/dS > 1 in the branches that passed the LRT.

## 00 **Structure Analysis**

01 Sequences were aligned to PDB 2FJ0, the *M. sexta* JHE [26] using PROMALS3D REF. Chimera [55]  
02 was used to visualize structures. The command swapaa was used to alter amino acids. Glycosylation  
03 sites were predicted using NetNGlyc (<http://www.cbs.dtu.dk/services/NetNGlyc-1.0/>).

#### 04 **Long-term development**

05 To determine the effect of OTFP and exogenous JH on larval development, ants were taken from  
06 laboratory *C. floridanus* colonies to construct five replicates for each treatment condition. Approximately  
07 90% of the ants were collected from inside the nest on the brood, while the remaining 10% were taken  
08 from outside the nest. Each colony explant had 20–30 workers (each treatment had the same number of  
09 replicates of any given colony) and was provided with five second or third instar larvae from their own  
10 colony of origin (staged larvae were equally distributed across replicates). Each explant was provided  
11 with water, 30% sugar water and maple-syrup-based ant diet. For each treatment both sugar water and  
12 food was supplemented with either solvent alone (ethanol), JH III, OTFP, or JH III and OTFP together  
13 (375  $\mu$ M JH, 40 nM OTFP final concentration). Like JH, OTFP was diluted in ethanol (OTFP generously  
14 provide by Prof. Takahiro Shiotsuki, National Institute of Agrobiological Science). The low concentration  
15 of OTFP was chosen based on [27] so as to inhibit only JHEs and not other enzymes. No insect-based  
16 food was provided. Food sources were refreshed twice per week. When JH and OTFP were  
17 administered in sugar water the solution was provided a glass tube, and when on food, they were  
18 administered on a glass coverslip because both JH and OTFP are adherent to plastic.

19 Twice weekly before feeding, each explant was checked for the presence of pre-pupae, and developing  
20 larvae were counted and their length was measured using a micrometer in the reticle of a  
21 stereomicroscope. Upon pupation, or cocoon spinning, larvae/pupae were removed and placed in a  
22 clean humid chamber until metamorphosis. The head width of the pupae was measured using a  
23 micrometer in the reticle of a stereomicroscope 1–4 days after metamorphosis (head width is not stable  
24 within the first 24 h after removal of the larval sheath). Long-term development experiments were  
25 stopped when larvae had not changed in size for 1 week, which occurred after six weeks. Of larvae that  
26 did not undergo pupation during the experiment, approximately 85% were eaten by nursing workers.

#### 27 **Sample sizes, data visualization and statistics**

28 For long-term development experiments, the number of same-staged larvae per colony was the limiting  
29 factor for the number of replicates per experiment. Statistics were done in R using built-in functions and  
30 'lmer' and 'glmer' functions of the lme4 package, and mixed model p-values were calculated with the  
31 'lmerTest' package. No data points were excluded as outliers and all replicates discussed are biological  
32 not technical replicates. Phylogenetic trees were visualized in FigTree 1.4.3. Molecular graphics and  
33 analyses were performed with the UCSF Chimera package [55]. Chimera is developed by the Resource  
34 for Biocomputing, Visualization, and Informatics at the University of California, San Francisco (supported  
35 by NIGMS P41-GM103311).

---

## 36 **Legends**

37 **Figure 1. The JHE-like esterase repertoire in *C. floridanus*.** Maximum likelihood tree of re-annotated  
38 *C. floridanus* carboxylesterases. Bootstrap (BS) values greater than 85 are indicated by black nodes.  
39 The four tandem arrays of esterases observed in the genome are represented by symbols. Cflo.Est14 is  
40 on a single-gene scaffold; circle and square arrays are found on the edge of contigs, indicating that  
41 these seven esterases may be a continuous DNA segment. Protein abundance is also shown in SI Table  
42 2 (percent of total NSAF). Catalytic triad sequence motifs in each carboxylesterase gene are shown in  
43 black if all motifs are present, and are shown in bold if the specific amino acids are consistent with



44 known JHEs. Sequences are shown in grey if one or more residues of the catalytic triad are missing;  
45 ellipses indicate missing sequence regions. Sequence length of each esterase is shown in grey circles,  
46 where filled circles indicate a complete or nearly complete sequence.

47 **Figure 2. *Camponotus* trophallactic esterases have duplicated, experienced positive selection**  
48 **and increased in trophallactic fluid abundance.** Protein tree of esterases in the clade containing the  
49 *Camponotus* trophallactic esterases (corresponding to the highlighted subtree in SI Figure 1). Red  
50 branches indicate positive selection (FDR <0.1). Branch numbers and significance values can be found  
51 in SI Figure 3 and SI Table 3. Nodes with bootstrap values greater than 85 are shown in black.  
52 Sequence length of each of the 101 esterase sequences from 31 species of ants, *A. mellifera* and *N.*  
53 *vitripennis* is shown in grey circles, where filled circles indicate a complete or nearly complete sequence.  
54 The portion of the tree corresponding to formicine ants is indicated in light blue, and the sequences from  
55 the genus *Camponotus* in yellow. For the four species where trophallactic fluid protein abundance has  
56 been measured, sequence names are in bold and color-coded by protein abundance (specific  
57 percentages can be found in SI Table 2). Red diamonds mark the four positively selected branches used  
58 to create Figure 3. Branch length is based on amino acid changes.

59 **Figure 3. Positively selected amino-acid changes in the abundant trophallactic esterases.** The  
60 protein structure on the left is the lepidopteran *M. sexta* JHE (2JF0) crystallized with the JHE inhibitor  
61 OTFP (blue) covalently bound in the binding pocket. The *Camponotus* protein, on the right, is same  
62 structure with the amino acids replaced at sites under positive selection (posterior probability > 0.95) in  
63 the four significant branches that differentiate the derived *Camponotus* sequences from the more  
64 ancestral sequences in *Camponotus* and *Formica*. At the mouth of the binding pocket, *M. sexta* has  
65 glycine at 2FJ0 position 312, *Formica* and Cflo.Est13 have proline, and Cflo.Est16 has phenylalanine  
66 (see Supplementary File 3). Novel predicted glycosylation sites are shown in turquoise. The catalytic  
67 triad is shown in yellow.

68 **Figure 4. The trophallactic esterases influence development *in vivo*.** A and B contain information  
69 from the same experiment which contained five replicates per treatment where a replicate is 20-30  
70 workers rearing five larvae over seven weeks. A, Head width of pupae raised by workers who were fed  
71 food supplemented with JH, OTFP, both JH and OTFP, or solvent alone. Median values and interquartile  
72 ranges are shown. GLMM testing for the effect of the two treatments on head width with colony as a  
73 random factor, JH,  $p < 0.001$ ; OTFP, not significant. B, Proportion of total larvae that pupated and the  
74 proportion of total larvae that metamorphosed when reared by workers that were fed food supplemented  
75 with JH, OTFP, both, or solvent only. Binomial GLMM testing effect of JH and OTFP on survival past  
76 metamorphosis with colony as a random factor,  $p < 0.018$  for each of JH and OTFP. Two-way ANOVA  
77 yielded  $p < 0.017$  for each treatment and there was no interaction between treatments.

---

## 78 Supplemental Legends

79 **SI Table 1. Variable presence of JH and JHE-like proteins in social insect trophallactic fluid.** JH  
80 titers in trophallactic fluid pooled from groups of individuals from different colonies of *C. floridanus* (12-19  
81 individuals, 1-12  $\mu$ l), *C. fellah* (16-46 individuals, 10-12  $\mu$ l), *S. invicta* (39-137 individuals, 1-9  $\mu$ l) and *A.*  
82 *mellifera* (5-20 individuals, 11-35  $\mu$ l). Measurements of *Camponotus* trophallactic fluid were performed in  
83 a separate experiment from those of *S. invicta* and *A. mellifera* trophallactic fluid. The GC-MS peaks  
84 corresponding to JH in the *S. invicta* and *A. mellifera* experiment were not above the noise floor of the  
85 assay.

86 **SI Table 2. Esterase abundance in different fluids and species.** Percent of total NSAF corresponding  
87 to the protein in question. Aside from larval samples, all data are from [4].

.88 **SI Figure 1. The phylogenetic tree used to define the clade containing the trophallactic esterases.**  
.89 Sequences that were redundant or shorter than 100 aa were filtered out before alignment. The *A.*  
.90 *mellifera* JHE, Amel.Est1, is indicated in red and the *C. floridanus* esterases in tandem arrays are  
.91 indicated in the colors corresponding approximately to their tandem arrays shown in Figure 1 (orange for  
.92 triangle, green for star and blue for all trophallactic esterases). The clade containing Amel.Est1 and the  
.93 trophallactic esterases is highlighted in yellow.

.94 **SI Figure 2. Maximum likelihood gene tree of JHE-like esterases from 16 insect species.** The tree  
.95 is midpoint rooted. Characterized JHEs are marked in red. Blue indicates the *Camponotus* trophallactic  
.96 esterases. The branch thickness and node size both indicate bootstrap value from 0 to 100. Tandem  
.97 arrays in *C. floridanus* are indicated by their symbols. Trophallactic esterases observed in *S. invicta* and  
.98 *A. mellifera* are found in the basal subclade containing the “triangle” *C. floridanus* esterases.

.99 **SI Table 3. Results of the branch-site test for the clade containing the trophallactic esterases.** The  
.00 displayed branches are inferred to be under positive selection based on the LRT of the branch-site test  
.01 with FDR adjusted p-value (q-value) <0.1.

.02 **SI Figure 3. *Camponotus* trophallactic esterases have duplicated and sustained positive**  
.03 **selection.** Clade containing 101 esterases from 31 species of ants, *A. mellifera* and *N. vitripennis*. Red  
.04 branches indicate positive selection (FDR <0.1). Nodes with bootstrap values greater than 85 are shown  
.05 in black. Branch numbers are indicated in black, Branch significance values can be found in SI Table 3.  
.06 Bootstrap values are indicated in color.

.07 **SI Figure 4. Branch length is correlated with protein abundance in trophallactic fluid.** Cumulative  
.08 lengths for branches after branch #191 for each of the esterases measured in trophallactic fluid and the  
.09 protein abundance for each. Spearman’s rank correlation  $p < 0.0005$ ,  $\rho = 0.85$ .

.10 **Supplementary File 1.** Zip-file of all esterase annotations, and the RT-PCR based determination that  
.11 E2ANU0 and E2AJM0 (Cflo.Est3 and Cflo.Est18) are the same gene.

.12 **Supplementary File 2.** Species used to build the three phylogenetic trees in SI Figure 1, SI Figure 2,  
.13 and Figure 2. Species present in SI Figure 1 but not Figure 2 were excluded due to suboptimal assembly  
.14 quality.

.15 **Supplementary file 3.** Positively selected amino-acid changes in the abundant trophallactic esterases.  
.16 Amino-acid changes are listed for each of the positively selected branches. Amongst these, those that  
.17 were significant according to the Bayes Empirical Bayes (BEB) analysis are indicated with an asterisk.  
.18 The second sheet shows an alignment to the 2FJ0 structure across the sequences shown in Figure 2.  
.19 The third sheet displays the amino-acid changes shown in Figure 3.

---

## .20 Acknowledgements

.21 We thank Dr. George Shizuo Kamita and Prof. Dr. David Heckel for advice regarding JHEs, Dr. Jonathan  
.22 Romiguier for his advice on available ant genomes, transcriptomes and methods, Dr. Christophe  
.23 Dessimoz and Clément Train for early discussions on duplications and orthology, Dr. Romiguier, Dr.  
.24 Kamita, Dr. David Hacker and Dr. Miriam Rosenberg for their valuable input on the manuscript. Mention  
.25 of trade names or commercial products in this article is solely for the purpose of providing specific  
.26 information and does not imply recommendation or endorsement by the U.S. Department of Agriculture.  
.27 USDA is an equal opportunity provider and employer.

## 28 References

- 29 1. Wheeler WM: **A study of some ant larvae, with a consideration of the origin and meaning of the**  
30 **social habit among insects.** *Proc. Amer. Phil Soc.* 1918, **57**:293–339.
- 31 2. Cassill DL, Tschinkel WR: **Allocation of liquid food to larvae via trophallaxis in colonies of the fire ant,**  
32 ***Solenopsis invicta*.** *Anim. Behav.* 1995, **50**:801–813.
- 33 3. Wilson EO, Eisner T: **Quantitative studies of liquid food transmission in ants.** *Insectes Soc.* 1957,  
34 **4**:157–166.
- 35 4. LeBoeuf AC, Waridel P, Brent CS, Gonçalves AN, Menin L, Ortiz D, Riba-Grognuz O, Koto A, Soares ZG,  
36 Privman E, et al.: **Oral transfer of chemical cues, growth proteins and hormones in social insects .**  
37 *Elife* 2016, **5**:1–27.
- 38 5. Nijhout HF, Riddiford LM, Mirth C, Shingleton AW, Suzuki Y, Callier V: **The developmental control of size**  
39 **in insects.** *Wiley Interdiscip. Rev. Dev. Biol.* 2014, **3**:113–134.
- 40 6. Goodman WG, Cusson M: **The Juvenile Hormones.** In *Insect Endocrinology.* . Elsevier; 2012:310–365.
- 41 7. Amsalem E, Malka O, Grozinger C, Hefetz A: **Exploring the role of juvenile hormone and vitellogenin in**  
42 **reproduction and social behavior in bumble bees.** . *BMC Evol. Biol.* 2014, **14**:45.
- 43 8. Shapiro AB, Wheelock GD, Hagedorn HH, Baker FC, Tsai LW, Schooley DA: **Juvenile hormone and**  
44 **juvenile hormone esterase in adult females of the mosquito *Aedes aegypti*.** *J. Insect Physiol.* 1986,  
45 **32**:867–877.
- 46 9. Barker JF, Herman WS: **Effect of photoperiod and temperature on reproduction of the monarch**  
47 **butterfly, *Danaus plexippus*.** *J. Insect Physiol.* 1976, **22**:1565–1568.
- 48 10. Nijhout HF, Wheeler DE: **Juvenile Hormone and the Physiological Basis of Insect Polymorphisms.** *Q.*  
49 *Rev. Biol.* 1982, **57**:109–133.
- 50 11. Nijhout HF: **The control of body size in insects.** *Dev. Biol.* 2003, **261**:1–9.
- 51 12. Flatt T, Tu M-P, Tatar M: **Hormonal pleiotropy and the juvenile hormone regulation of *Drosophila***  
52 **development and life history .** *BioEssays* 2005, **27**:999–1010.
- 53 13. Libbrecht R, Corona M, Wende F, Azevedo DO, Serrão JE, Keller L: **Interplay between insulin signaling,**  
54 **juvenile hormone, and vitellogenin regulates maternal effects on polyphenism in ants. .** *Proc. Natl.*  
55 *Acad. Sci. U. S. A.* 2013, **110**:11050–5.
- 56 14. Ament S a, Wang Y, Chen C-C, Blatti C a, Hong F, Liang ZS, Negre N, White KP, Rodriguez-Zas SL,  
57 Mizzen C a, et al.: **The transcription factor ultraspiracle influences honey bee social behavior and**  
58 **behavior-related gene expression. .** *PLoS Genet.* 2012, **8**:e1002596.
- 59 15. Schulz DJ, Sullivan JP, Robinson GE: **Juvenile Hormone and Octopamine in the Regulation of Division**  
60 **of Labor in Honey Bee Colonies .** *Horm. Behav.* 2002, **42**:222–231.
- 61 16. Wang Y, Brent CS, Fennern E, Amdam G V.: **Gustatory perception and fat body energy metabolism are**  
62 **jointly affected by vitellogenin and juvenile hormone in honey bees.** *PLoS Genet.* 2012, **8**.
- 63 17. Toth AL, Robinson GE: **Evo-devo and the evolution of social behavior.** *Trends Genet.* 2007, **23**:334–  
64 341.
- 65 18. Giray T, Giovanetti M, West-Eberhard MJ: **Juvenile hormone, reproduction, and worker behavior in the**  
66 **neotropical social wasp *Polistes canadensis* .** *Proc. Natl. Acad. Sci.* 2005, **102**:3330–3335.
- 67 19. Jindra M, Palli SR, Riddiford LM: **The Juvenile Hormone Signaling Pathway in Insect Development.**  
68 *Annu. Rev. Entomol.* 2013, **58**:181–204.
- 69 20. Bomtorin AD, Mackert A, Rosa GCC, Moda LM, Martins JR, Bitondi MMG, Hartfelder K, Simões ZLP:  
70 **Juvenile hormone biosynthesis gene expression in the corpora allata of honey bee (*Apis mellifera***  
71 **L.) female castes.** *PLoS One* 2014, **9**.
- 72 21. Lillico-Ouachour A, Abouheif E: **Regulation, development, and evolution of caste ratios in the**  
73 **hyperdiverse ant genus *Pheidole*.** *Curr. Opin. Insect Sci.* 2017, doi:10.1016/j.cois.2016.11.003.
- 74 22. Kamita SG, Hammock BD: **Juvenile hormone esterase: biochemistry and structure. .** *J. Pestic. Sci.*

- .75 2010, **35**:265–274.
- .76 23. Zhu L, Yin TY, Sun D, Liu W, Zhu F, Lei CL, Wang XP: **Juvenile hormone regulates the differential**  
.77 **expression of putative juvenile hormone esterases via methoprene-tolerant in non-diapause-**  
.78 **destined and diapause-destined adult female beetle** . *Gene* 2017, **627**:373–378.
- .79 24. Mackert A, do Nascimento AM, Bitondi MMG, Hartfelder K, Simões ZLP: **Identification of a juvenile**  
.80 **hormone esterase-like gene in the honey bee, *Apis mellifera* L.--expression analysis and functional**  
.81 **assays**. *Comp. Biochem. Physiol. B. Biochem. Mol. Biol.* 2008, **150**:33–44.
- .82 25. Kontogiannatos D, Swevers L, Kourti A: **Recent gene multiplication and evolution of a juvenile**  
.83 **hormone esterase-related gene in a lepidopteran pest** . *Gene Reports* 2016, **4**:139–152.
- .84 26. Wogulis M, Wheelock CE, Kamita SG, Hinton AC, Whetstone PA, Hammock BD, Wilson DK: **Structural**  
.85 **studies of a potent insect maturation inhibitor bound to the juvenile hormone esterase of *Manduca***  
.86 ***sexta***. *Biochemistry* 2006, **45**:4045–4057.
- .87 27. Kamita SG, Samra AI, Liu JY, Cornel AJ, Hammock BD: **Juvenile hormone (JH) esterase of the**  
.88 **mosquito *Culex quinquefasciatus* is not a target of the JH analog insecticide methoprene**. *PLoS One*  
.89 2011, **6**.
- .90 28. Ward VK, Bonning BC, Huang T, Shiotsuki T, Griffeth VN, Hammock BD: **Analysis of the catalytic**  
.91 **mechanism of juvenile hormone esterase by site-directed mutagenesis** . *Int. J. Biochem.* 1992,  
.92 **24**:1933–1941.
- .93 29. Campbell PM, Oakeshott JG, Healy MJ: **Purification and kinetic characterisation of juvenile hormone**  
.94 **esterase from *Drosophila melanogaster***. *Insect Biochem. Mol. Biol.* 1998, **28**:501–515.
- .95 30. Oakeshott JG, Claudianos C, Russell RJ, Robin GC: **Carboxyl/cholinesterases: A case study of the**  
.96 **evolution of a successful multigene family**. *BioEssays* 1999, **21**:1031–1042.
- .97 31. Younus F, Fraser NJ, Coppin CW, Liu JW, Correy GJ, Chertemps T, Pandey G, Maïbèche M, Jackson CJ,  
.98 Oakeshott JG: **Molecular basis for the behavioral effects of the odorant degrading enzyme Esterase 6**  
.99 **in *Drosophila*** . *Sci. Rep.* 2017, **7**:1–12.
- .00 32. Claudianos C, Ranson H, Johnson RM, Biswas S, Schuler MA, Berenbaum MR, Feyereisen R, Oakeshott  
.01 JG: **A deficit of detoxification enzymes: Pesticide sensitivity and environmental response in the**  
.02 **honeybee**. *Insect Mol. Biol.* 2006, **15**:615–636.
- .03 33. Yang Z: **PAML: a program package for phylogenetic analysis by maximum likelihood**. *Bioinformatics*  
.04 1997, **13**:555–556.
- .05 34. Yang Z: **PAML 4: Phylogenetic analysis by maximum likelihood**. *Mol. Biol. Evol.* 2007, **24**:1586–1591.
- .06 35. Rajakumar R, San Mauro D, Dijkstra MB, Huang MH, Wheeler DE, Hiou-Tim F, Khila a., Cournoyea M,  
.07 Abouheif E: **Ancestral Developmental Potential Facilitates Parallel Evolution in Ants**. *Science (80-. )*.  
.08 2012, **335**:79–82.
- .09 36. Mutti NS, Dolezal AG, Wolschin F, Mutti JS, Gill KS, Amdam G V.: **IRS and TOR nutrient-signaling**  
.10 **pathways act via juvenile hormone to influence honey bee caste fate** . *J. Exp. Biol.* 2011, **214**:3977–  
.11 3984.
- .12 37. Page RE, Peng CYS: **Aging and development in social insects with emphasis on the honey bee, *Apis***  
.13 ***mellifera* L.** *Exp. Gerontol.* 2001, **36**:695–711.
- .14 38. Schultner E, Oettler J: **The Role of Brood in Eusocial Hymenoptera**. 2017, **92**.
- .15 39. Porter SD: **Impact of temperature on colony growth and developmental rates of the ant, *Solenopsis***  
.16 ***invicta*** . *J. Insect Physiol.* 1988, **34**:1127–1133.
- .17 40. Abdel-Aal Y a, Hammock BD: **Transition state analogs as ligands for affinity purification of juvenile**  
.18 **hormone esterase** . *Science (80-. )*. 1986, **233**:1073–1076.
- .19 41. Tragust S, Mitteregger B, Barone V, Konrad M, Ugelvig L V., Cremer S: **Ants disinfect fungus-exposed**  
.20 **brood by oral uptake and spread of their poison** . *Curr. Biol.* 2013, **23**:76–82.
- .21 42. Pull CD, Ugelvig L V., Wiesenhofer F, Grasse A V., Tragust S, Schmitt T, Brown MJF, Cremer S:  
.22 **Destructive disinfection of infected brood prevents systemic disease spread in ant colonies**. *Elife*  
.23 2018, **7**:1–29.

- 24 43. Shevchenko A, Tomas H, Havlis J, Olsen J V, Mann M: **In-gel digestion for mass spectrometric**  
25 **characterization of proteins and proteomes.** *Nat. Protoc.* 2006, **1**:2856–2860.
- 26 44. Keller A, Nesvizhskii AI, Kolker E, Aebersold R: **Empirical statistical model to estimate the accuracy of**  
27 **peptide identifications made by MS/MS and database search.** *Anal. Chem.* 2002, **74**:5383–5392.
- 28 45. Nesvizhskii AI, Keller A, Kolker E, Aebersold R: **A statistical model for identifying proteins by tandem**  
29 **mass spectrometry.** *Anal. Chem.* 2003, **75**:4646–4658.
- 30 46. Zybailov B, Mosley AL, Sardiu ME, Coleman MK, Florens L, Washburn MP: **Statistical analysis of**  
31 **membrane proteome expression changes in *Saccharomyces cerevisiae*.** *J Proteome Res* 2006,  
32 **5**:2339–2347.
- 33 47. She R, Chu JSC, Uyar B, Wang J, Wang K, Chen N: **genBlastG: Using BLAST searches to build**  
34 **homologous gene models.** *Bioinformatics* 2011, **27**:2141–2143.
- 35 48. Simossis VA, Heringa J: **PRALINE: A multiple sequence alignment toolbox that integrates homology-**  
36 **extended and secondary structure information.** *Nucleic Acids Res.* 2005, **33**.
- 37 49. Stamatakis A: **RAXML-VI-HPC: Maximum likelihood-based phylogenetic analyses with thousands of**  
38 **taxa and mixed models.** *Bioinformatics* 2006, **22**:2688–2690.
- 39 50. Löytynoja A, Goldman N: **Phylogeny-aware gap placement prevents errors in sequence alignment and**  
40 **evolutionary analysis.** *Science (80-. ).* 2008, **320**:1632–1635.
- 41 51. Sela I, Ashkenazy H, Katoh K, Pupko T: **GUIDANCE2: Accurate detection of unreliable alignment**  
42 **regions accounting for the uncertainty of multiple parameters.** *Nucleic Acids Res.* 2015, **43**:W7–W14.
- 43 52. Penn O, Privman E, Landan G, Graur D, Pupko T: **An alignment confidence score capturing robustness**  
44 **to guide tree uncertainty.** *Mol. Biol. Evol.* 2010, **27**:1759–1767.
- 45 53. Zhang J, Nielsen R, Yang Z: **Evaluation of an improved branch-site likelihood method for detecting**  
46 **positive selection at the molecular level.** *Mol. Biol. Evol.* 2005, **22**:2472–2479.
- 47 54. Benjamini Y, Hochberg Y: **Controlling the false discovery rate: a practical and powerful approach to**  
48 **multiple testing .** *J. R. Stat. Soc. B* 1995, **57**:289–300.
- 49 55. Pettersen EF, Goddard TD, Huang CC, Couch GS, Greenblatt DM, Meng EC, Ferrin TE: **UCSF Chimera—**  
50 **A Visualization System for Exploratory Research and Analysis .** *J Comput Chem* 2004, **25**:1605–1612.

51

52

## Main Figures

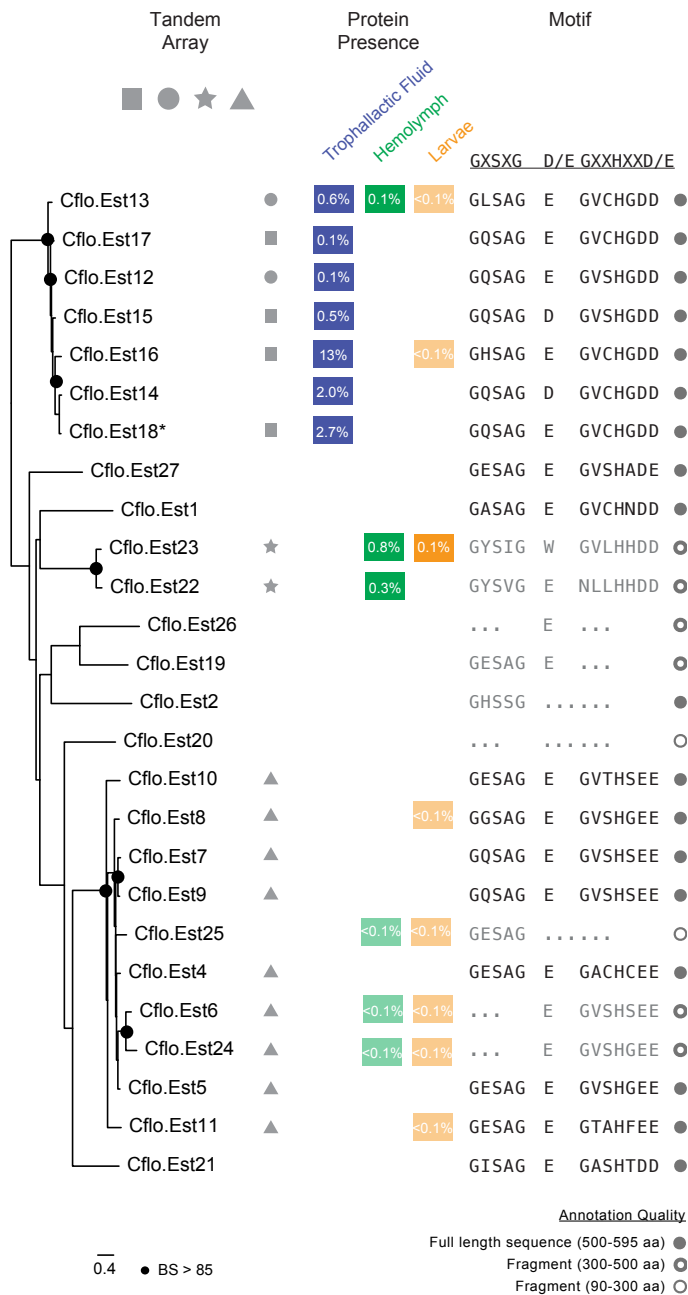

**Figure 1. The JHE-like esterase repertoire in *C. floridanus*.** Maximum likelihood tree of re-annotated *C. floridanus* carboxylesterases. Bootstrap (BS) values greater than 85 are indicated by black nodes. The four tandem arrays of esterases observed in the genome are represented by symbols. Cflo.Est14 is on a single-gene scaffold; circle and square arrays are found on the edge of contigs, indicating that these seven esterases may be a continuous DNA segment. Protein abundance is also shown in SI Table 2 (percent of total NSAF). Catalytic triad sequence motifs in each carboxylesterase gene are shown in black if all motifs are present, and are shown in bold if the specific amino acids are consistent with known JHEs. Sequences are shown in grey if one or more residues of the catalytic triad are missing; ellipses indicate missing sequence regions. Sequence length of each esterase is shown in grey circles, where filled circles indicate a complete or nearly complete sequence.

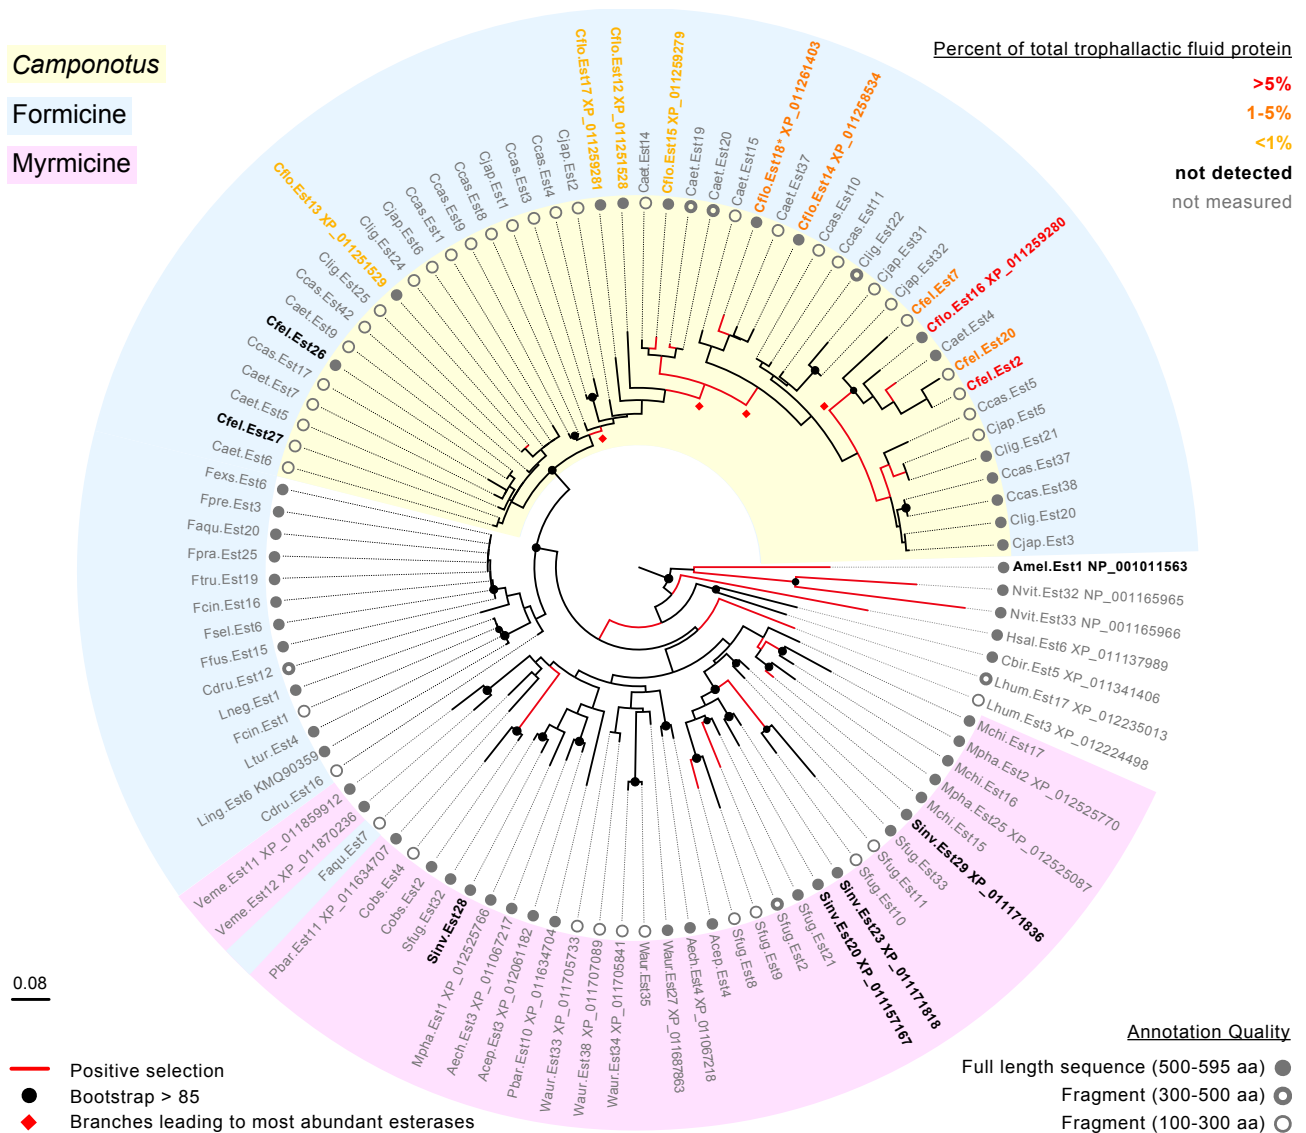

**Figure 2. *Camponotus* trophallactic esterases have duplicated, experienced positive selection and increased in trophallactic fluid abundance.** Protein tree of esterases in the clade containing the *Camponotus* trophallactic esterases (corresponding to the highlighted subtree in SI Figure 1). Red branches indicate positive selection (FDR < 0.1). Branch numbers and significance values can be found in SI Figure 3 and SI Table 3. Nodes with bootstrap values greater than 85 are shown in black. Sequence length of each of the 101 esterase sequences from 31 species of ants, *A. mellifera* and *N. vitripennis* is shown in grey circles, where filled circles indicate a complete or nearly complete sequence. The portion of the tree corresponding to formicine ants is indicated in light blue, and the sequences from the genus *Camponotus* in yellow. For the four species where trophallactic fluid protein abundance has been measured, sequence names are in bold and color-coded by protein abundance (specific percentages can be found in SI Table 2). Red diamonds mark the four positively selected branches used to create Figure 3. Branch length is based on amino acid changes.

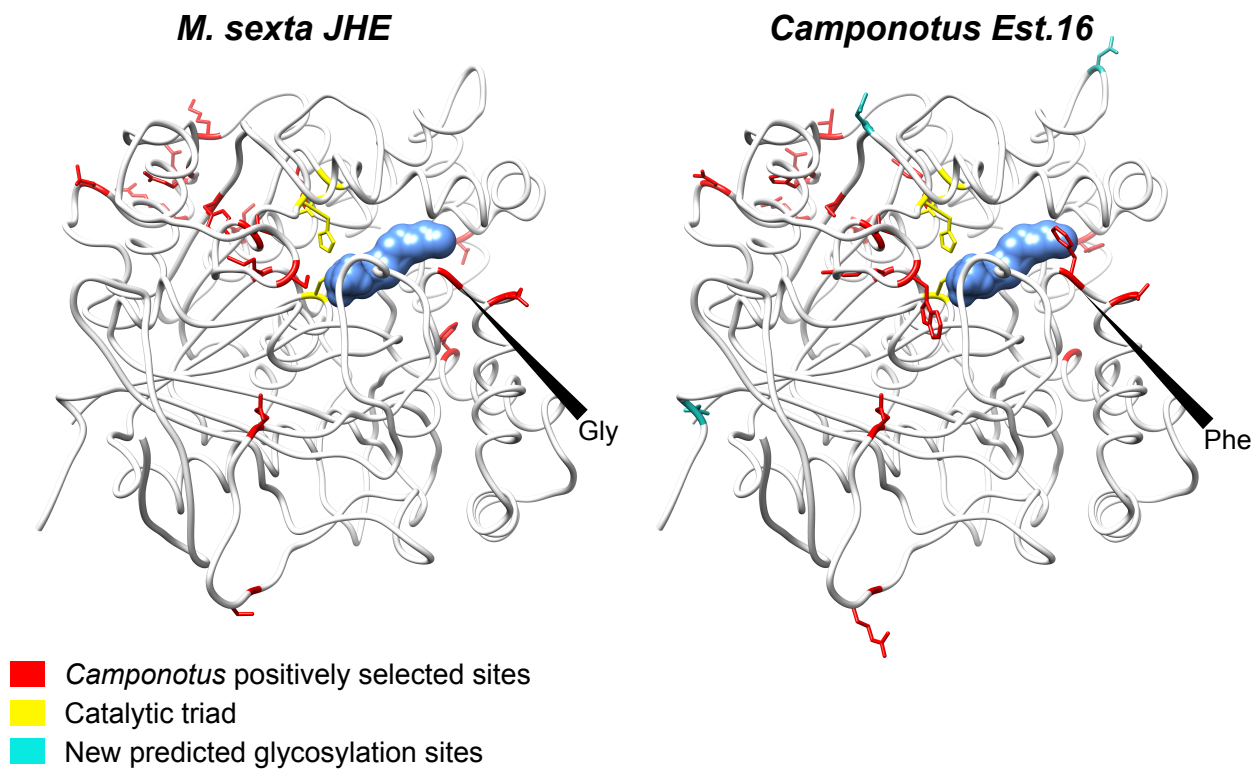

**Figure 3. Positively selected amino-acid changes in the abundant trophallactic esterases.** The protein structure on the left is the lepidopteran *M. sexta* JHE (2JF0) crystallized with the JHE inhibitor OTFP (blue) covalently bound in the binding pocket. The *Camponotus* protein, on the right, is same structure with the amino acids replaced at sites under positive selection (posterior probability > 0.95) in the four significant branches that differentiate the derived *Camponotus* sequences from the more ancestral sequences in *Camponotus* and *Formica*. At the mouth of the binding pocket, *M. sexta* has glycine at 2FJ0 position 312, *Formica* and Cflo.Est13 have proline, and Cflo.Est16 has phenylalanine (see Supplementary File 3). Novel predicted glycosylation sites are shown in turquoise. The catalytic triad is shown in yellow.



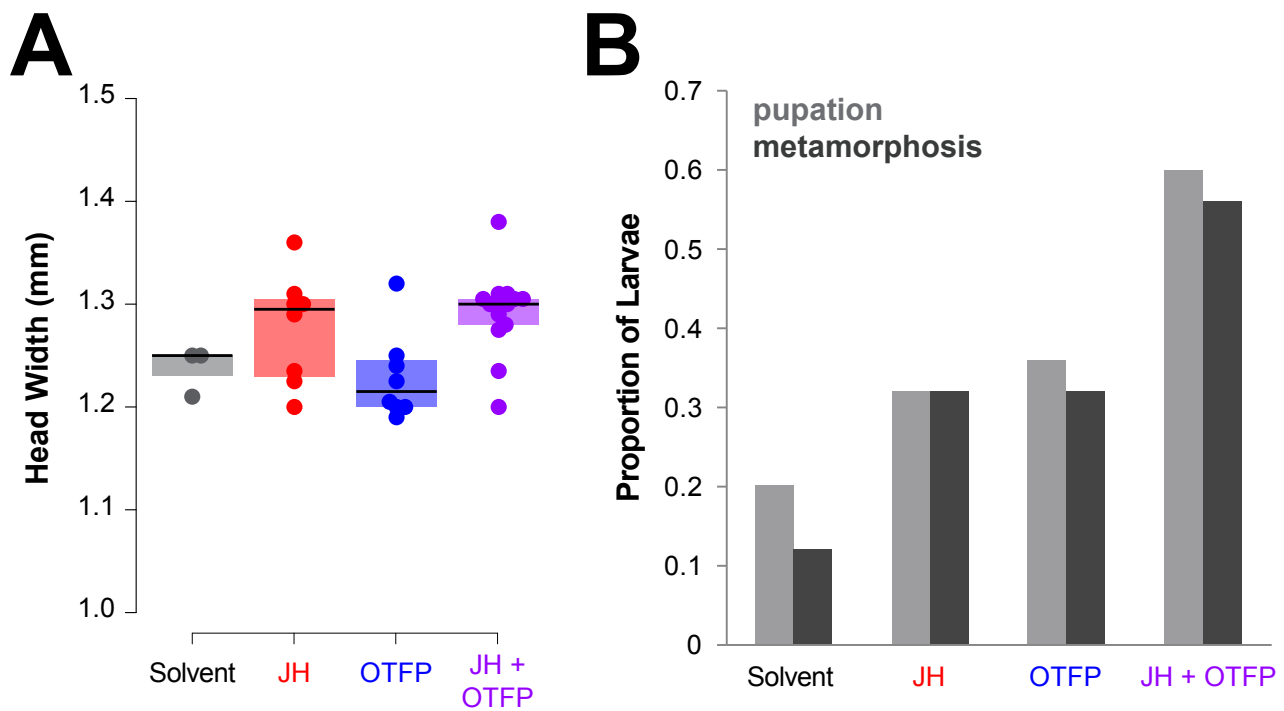

**Figure 4. The trophallactic esterases influence development *in vivo*.** A and B contain information from the same experiment which contained five replicates per treatment where a replicate is 20-30 workers rearing five larvae over seven weeks. A, Head width of pupae raised by workers who were fed food supplemented with JH, OTFP, both JH and OTFP, or solvent alone. Median values and interquartile ranges are shown. GLMM testing for the effect of the two treatments on head width with colony as a random factor, JH,  $p < 0.001$ ; OTFP, not significant. B, Proportion of total larvae that pupated and the proportion of total larvae that metamorphosed when reared by workers that were fed food supplemented with JH, OTFP, both, or solvent only. Binomial GLMM testing effect of JH and OTFP on survival past metamorphosis with colony as a random factor,  $p < 0.018$  for each of JH and OTFP. Two-way ANOVA yielded  $p < 0.017$  for each treatment and there was no interaction between treatments.

## Supplemental Information

### SI Table 1

#### Experiment 1

| Species              | JH III (pg/ $\mu$ l) | Colony |
|----------------------|----------------------|--------|
| <i>C. fellah</i>     | 1815.44              | C28    |
| <i>C. fellah</i>     | 1356.92              | C33    |
| <i>C. fellah</i>     | 3621.84              | C5     |
| <i>C. fellah</i>     | 6787.81              | C33    |
| <i>C. fellah</i>     | 8142.26              | C28    |
| <i>C. fellah</i>     | 1624.9               | C5     |
| <i>C. floridanus</i> | 19949.24             | A13    |
| <i>C. floridanus</i> | 8712.29              | A17    |
| <i>C. floridanus</i> | 9268.36              | A23    |
| <i>C. floridanus</i> | 21779.98             | A24    |
| <i>C. floridanus</i> | 5679.53              | A26    |
| <i>C. floridanus</i> | 25299.61             | A5     |
| <i>C. floridanus</i> | 6052.23              | B52    |
| <i>C. floridanus</i> | 6888                 | A13    |
| <i>C. floridanus</i> | 1484.54              | A17    |
| <i>C. floridanus</i> | 2895.08              | A23    |
| <i>C. floridanus</i> | 4712.64              | A24    |
| <i>C. floridanus</i> | 2981.26              | A26    |
| <i>C. floridanus</i> | 12036.16             | A5     |
| <i>C. floridanus</i> | 6131.24              | B52    |

#### Experiment 2

| Species             | JH III (pg/ $\mu$ l) |
|---------------------|----------------------|
| <i>A. mellifera</i> | 0.03                 |
| <i>A. mellifera</i> | 0.01                 |
| <i>A. mellifera</i> | 0.06                 |
| <i>A. mellifera</i> | 0.03                 |
| <i>S. invicta</i>   | 0.58                 |
| <i>S. invicta</i>   | 0.23                 |
| <i>S. invicta</i>   | 0.1                  |
| <i>S. invicta</i>   | 0.06                 |

**SI Table 1. Variable presence of JH and JHE-like proteins in social insect trophallactic fluid.** JH titers in trophallactic fluid pooled from groups of individuals from different colonies of *C. floridanus* (12-19 individuals, 1-12  $\mu$ l), *C. fellah* (16-46 individuals, 10-12  $\mu$ l), *S. invicta* (39-137 individuals, 1-9  $\mu$ l) and *A. mellifera* (5-20 individuals, 11-35  $\mu$ l). Measurements of *Camponotus* trophallactic fluid were performed in a separate experiment from those of *S. invicta* and *A. mellifera* trophallactic fluid. The GC-MS peaks corresponding to JH in the *S. invicta* and *A. mellifera* experiment were not above the noise floor of the assay.

## SI Table 2

| Name        | Accession Number             | <i>C. floridanus</i>       | <i>C. fellah</i>          | <i>C. floridanus</i> | <i>C. floridanus</i> |
|-------------|------------------------------|----------------------------|---------------------------|----------------------|----------------------|
|             |                              | Trophallactic fluid (n=15) | Trophallactic fluid (n=6) | Hemolymph (n=6)      | Larvae (n=2)         |
| Cflo.Est6   | E2ADW6_CAMFO                 | 0%                         | 0%                        | < 0.1%               | < 0.1%               |
| Cflo.Est8   | E2ADW9_CAMFO                 | 0%                         | 0%                        | 0%                   | < 0.1%               |
| Cflo.Est9   | E2ADW4_CAMFO                 | 0%                         | 0%                        | 0%                   | 0%                   |
| Cflo.Est10  | E2ADW3_CAMFO                 | 0%                         | 0%                        | 0%                   | 0%                   |
| Cflo.Est11  | E2ADW2_CAMFO                 | 0%                         | 0%                        | 0%                   | < 0.1%               |
| Cflo.Est12  | E2A4N6_CAMFO                 | 0.1% ± 0.6%                | 0.2% ± 0.2%               | 0%                   | 0%                   |
| Cflo.Est13  | E2A4N5_CAMFO                 | 0.6% ± 0.5%                | 0.8% ± 0.2%               | 0.12% ± 0.09%        | < 0.1%               |
| Cflo.Est14  | E2AI90_CAMFO                 | 2.0% ± 0.9%                | 0.6% ± 0.2%               | 0%                   | 0%                   |
| Cflo.Est15  | E2AJL9_CAMFO                 | 0.5% ± 0.6%                | 1.0% ± 0.5%               | 0%                   | 0%                   |
| Cflo.Est16  | E2AJL8_CAMFO                 | 13.0% ± 3.0%               | 0.4% ± 0.1%               | 0%                   | < 0.1%               |
| Cflo.Est17  | E2AJL7_CAMFO                 | 0%                         | 0.1% ± 0.2%               | 0%                   | 0%                   |
| Cflo.Est18* | E2ANU0_CAMFO + E2AJM0_CAMFO  | 2.7% ± 1.2%                | 0.2% ± 0.1%               | 0%                   | 0%                   |
| Cflo.Est22  | E2AM67_CAMFO                 | 0%                         | 0%                        | 0.34% ± 0.16%        | 0%                   |
| Cflo.Est23  | E2AM68_CAMFO                 | 0%                         | 0%                        | 0.76% ± 0.35%        | < 0.1%               |
| Cflo.Est24  | E2ADW8_CAMFO                 | 0%                         | 0%                        | < 0.1%               | < 0.1%               |
| Cflo.Est25  | E2AG31_CAMFO                 | 0%                         | 0%                        | < 0.1%               | < 0.1%               |
| Cfel.Est1   | comp44490_c0_seq1_2_217      | 0%                         | 0.8% ± 0.3%               | 0%                   | 0%                   |
| Cfel.Est2   | comp45677_c0_seq1_3_767 (+2) | 0%                         | 5.4% ± 1.5%               | 0%                   | 0%                   |
| Cfel.Est6   | comp46324_c0_seq1_2_208      | 0%                         | 1.1% ± 0.3%               | 0%                   | 0%                   |
| Cfel.Est7   | comp53526_c0_seq1_3_458      | 0%                         | 3.3% ± 0.4%               | 0%                   | 0%                   |
| Cfel.Est20  | comp62625_c0_seq1_17_295     | 0%                         | 2.1% ± 1.2%               | 0%                   | 0%                   |
| Cfel.Est21  | comp62625_c0_seq2_153_389    | 0%                         | 2.1% ± 1.3%               | 0%                   | 0%                   |
|             |                              |                            |                           |                      |                      |
| Name        | Accession Number             | <i>A. mellifera</i>        |                           |                      |                      |
|             |                              | Trophallactic fluid (n=6)  |                           |                      |                      |
| -           | A0A088A5D7_APIME / LOC552229 | 2.1% ± 1.2%                |                           |                      |                      |
|             |                              |                            |                           |                      |                      |
| Name        | Accession Number             | <i>S. invicta</i>          |                           |                      |                      |
|             |                              | Trophallactic fluid (n=3)  |                           |                      |                      |
| Sinv.Est4   | XP_011162808.1 / 751219447   | 0.2% ± 0.2%                |                           |                      |                      |
| Sinv.Est15  | XP_011164602.1 / 751222706   | 0.1% ± 0.1%                |                           |                      |                      |
| Sinv.Est16  | XP_011162491.1 / 751218861   | < 0.1%                     |                           |                      |                      |
| Sinv.Est25  | XP_011169840.1 / 751232451   | 0.1% ± 0.2%                |                           |                      |                      |
| -           | XP_011160598.1 / 751215387   | 0.3% ± 0.5%                |                           |                      |                      |

**SI Table 2. Esterase abundance in different fluids and species.** Percent of total NSAF corresponding to the protein in question. Aside from larval samples, all data are from [4].

SI Figure 1

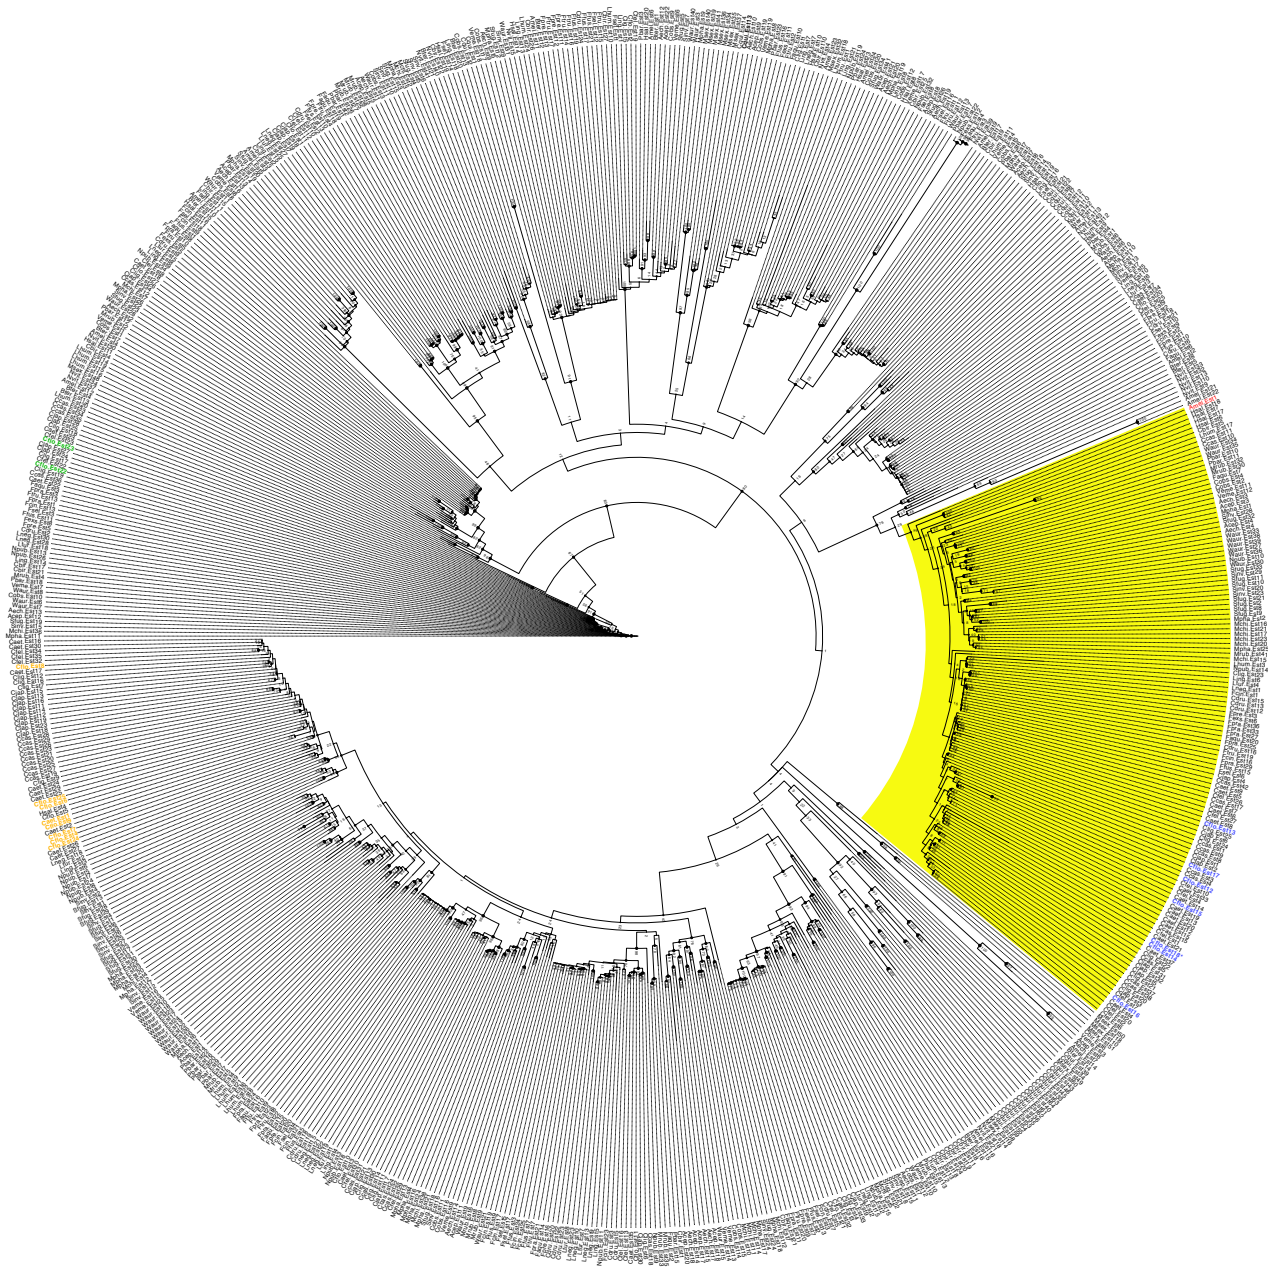

**SI Figure 1. The phylogenetic tree used to define the clade containing the trophallactic esterases.** Sequences that were redundant or shorter than 100 aa were filtered out before alignment. The *A. mellifera* JHE, Amel.Est1, is indicated in red and the *C. floridanus* esterases in tandem arrays are indicated in the colors corresponding approximately to their tandem arrays shown in Figure 1 (orange for triangle, green for star and blue for all trophallactic esterases). The clade containing Amel.Est1 and the trophallactic esterases is highlighted in yellow.

SI Figure 2.

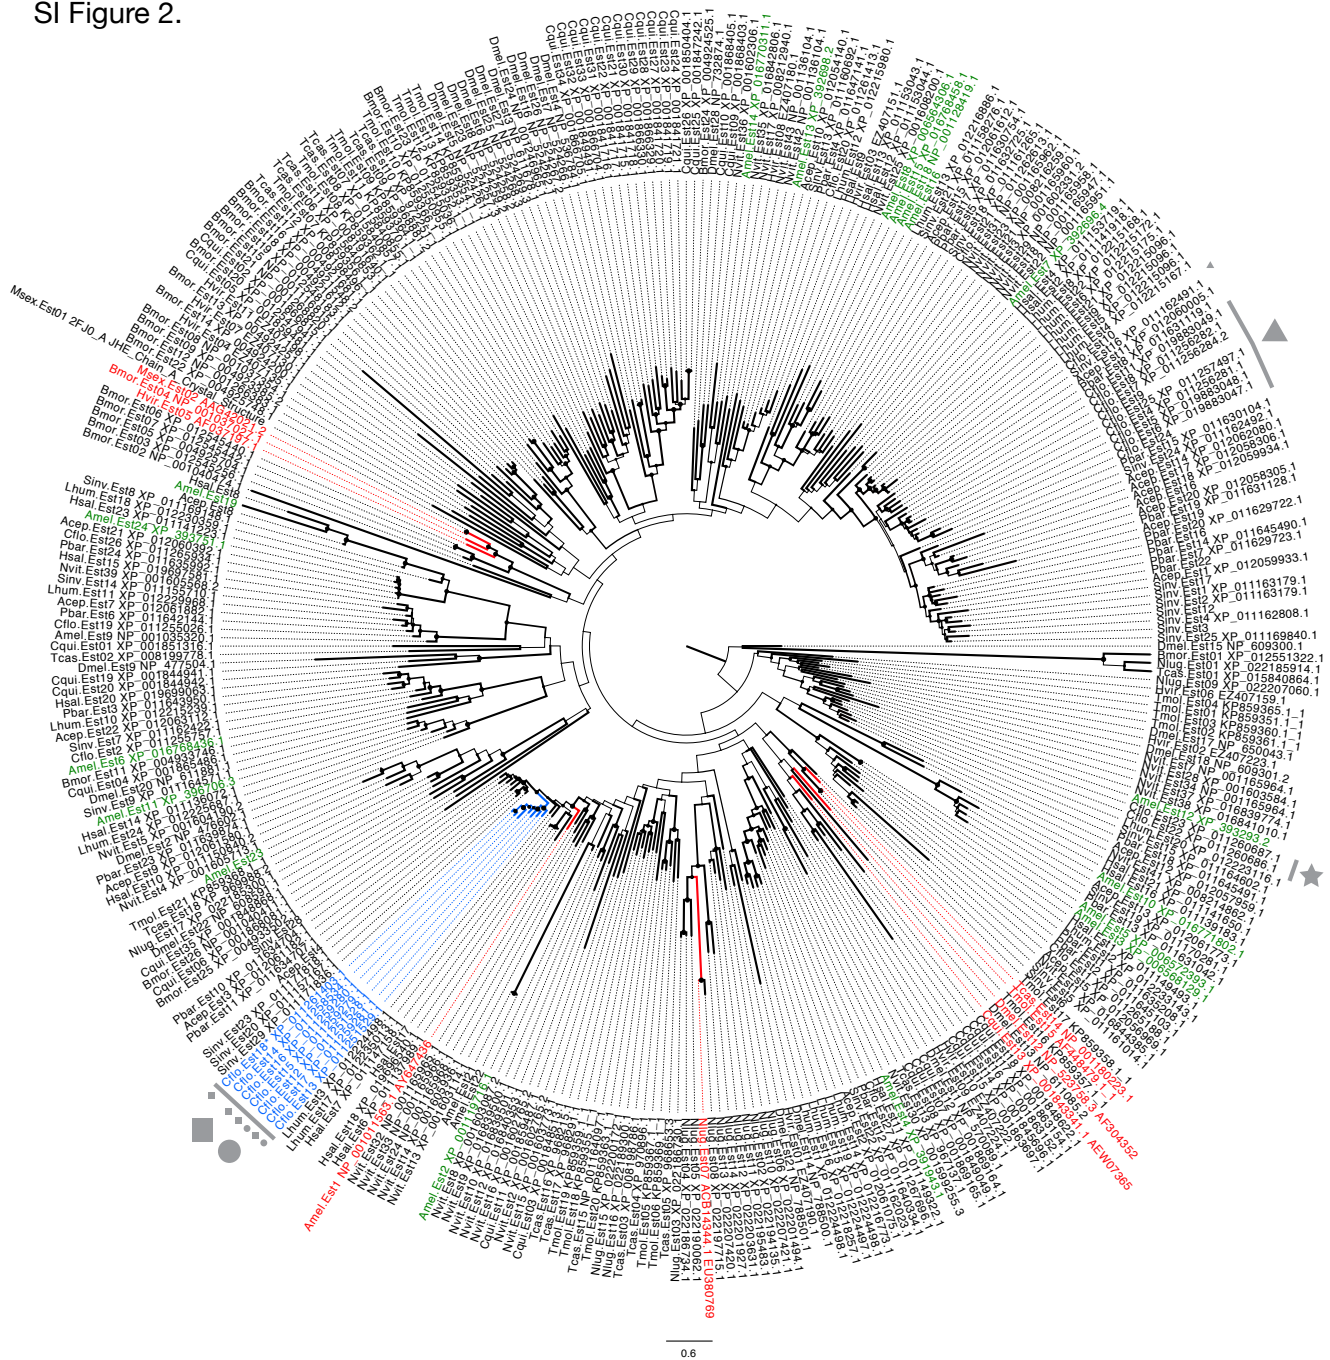

**SI Figure 2. Maximum likelihood gene tree of JHE-like esterases from 16 insect species.** The tree is midpoint rooted. Characterized JHEs are marked in red. Blue indicates the *Camponotus* trophallactic esterases. The branch thickness and node size both indicate bootstrap value from 0 to 100. Tandem arrays in *C. floridanus* are indicated by their symbols. Trophallactic esterases observed in *S. invicta* and *A. mellifera* are found in the basal subclade containing the “triangle” *C. floridanus* esterases.

### SI Table 3

| branch No. | W      | p-value  | q-value |
|------------|--------|----------|---------|
| 1          | 17.47  | 3.97E-04 | 0.052   |
| 2          | 130.93 | 5.97E-04 | 0.052   |
| 3          | 68.98  | 3.25E-04 | 0.052   |
| 4          | 71.92  | 1.35E-05 | 0.052   |
| 6          | 6.12   | 1.15E-04 | 0.052   |
| 10         | 119.07 | 3.34E-03 | 0.053   |
| 14         | 46.09  | 9.58E-04 | 0.052   |
| 16         | 162.64 | 5.35E-03 | 0.062   |
| 18         | 210.07 | 1.33E-03 | 0.052   |
| 25         | 19.82  | 2.61E-03 | 0.053   |
| 30         | 999.00 | 7.50E-10 | 0.052   |
| 33         | 17.07  | 1.04E-03 | 0.052   |
| 66         | 197.00 | 3.35E-04 | 0.052   |
| 116        | 58.72  | 5.73E-05 | 0.052   |
| 136        | 999.00 | 1.14E-02 | 0.086   |
| 138        | 417.95 | 2.74E-03 | 0.053   |
| 139        | 216.53 | 2.31E-05 | 0.052   |
| 141        | 72.20  | 1.10E-02 | 0.086   |
| 143        | 22.67  | 1.52E-02 | 0.095   |
| 161        | 71.88  | 4.63E-04 | 0.052   |
| 167        | 15.61  | 2.07E-04 | 0.052   |
| 171        | 306.21 | 4.70E-05 | 0.052   |
| 172        | 139.32 | 4.60E-04 | 0.052   |
| 180        | 36.32  | 9.89E-03 | 0.083   |
| 183        | 123.30 | 6.67E-09 | 0.052   |
| 184        | 58.42  | 1.14E-03 | 0.052   |
| 189        | 170.84 | 1.43E-02 | 0.100   |
| 193        | 343.36 | 1.71E-03 | 0.052   |

**SI Table 3. Results of the branch-site test for the clade containing the trophallactic esterases.** The displayed branches are inferred to be under positive selection based on the LRT of the branch-site test with FDR adjusted p-value (q-value) <0.1.

SI Figure 3.

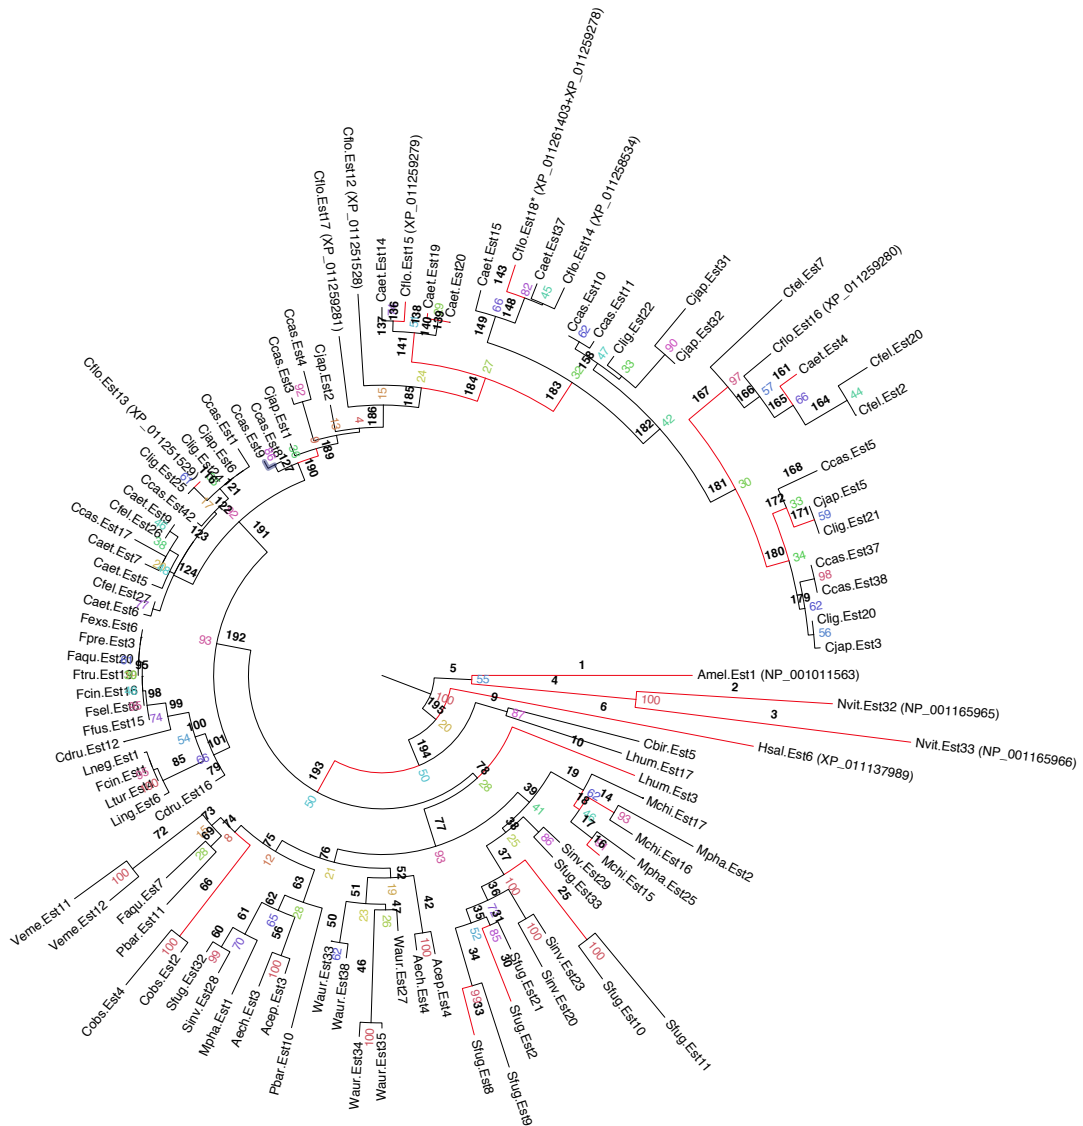

**SI Figure 3. *Camponotus trophallacticus* esterases have duplicated and sustained positive selection.** Clade containing 101 esterases from 31 species of ants, *A. mellifera* and *N. vitripennis*. Red branches indicate positive selection (FDR < 0.1). Nodes with bootstrap values greater than 85 are shown in black. Branch numbers are indicated in black, Branch significance values can be found in SI Table 3. Bootstrap values are indicated in color.

SI Figure 4.

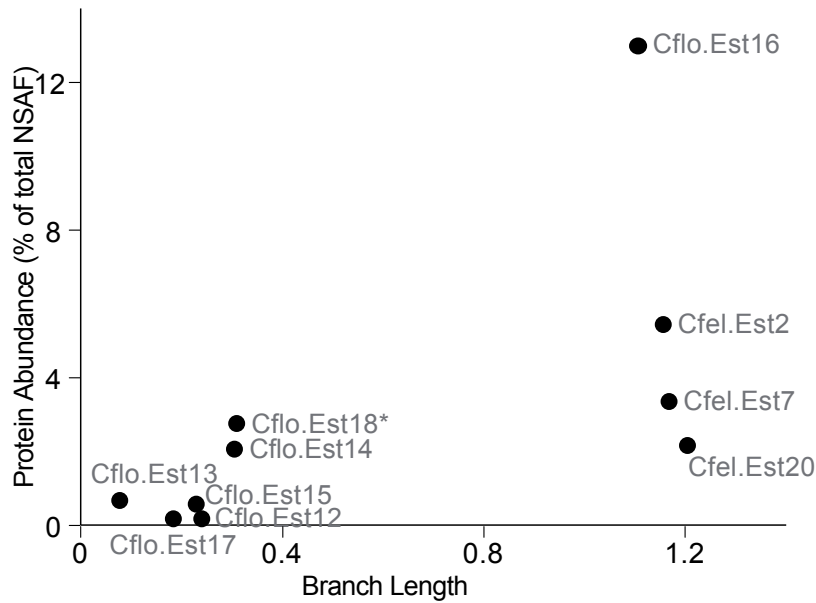

**SI Figure 4. Branch length is correlated with protein abundance in trophallactic fluid.** Cumulative lengths for branches after branch #191 for each of the esterases measured in trophallactic fluid and the protein abundance for each. Spearman's rank correlation  $p < 0.0005$ ,  $\rho=0.85$ .
